# Supplementary material
Source: publisher figshare collection journal article supplement (https://frontiersin.figshare.com/ndownloader/files/12725078)

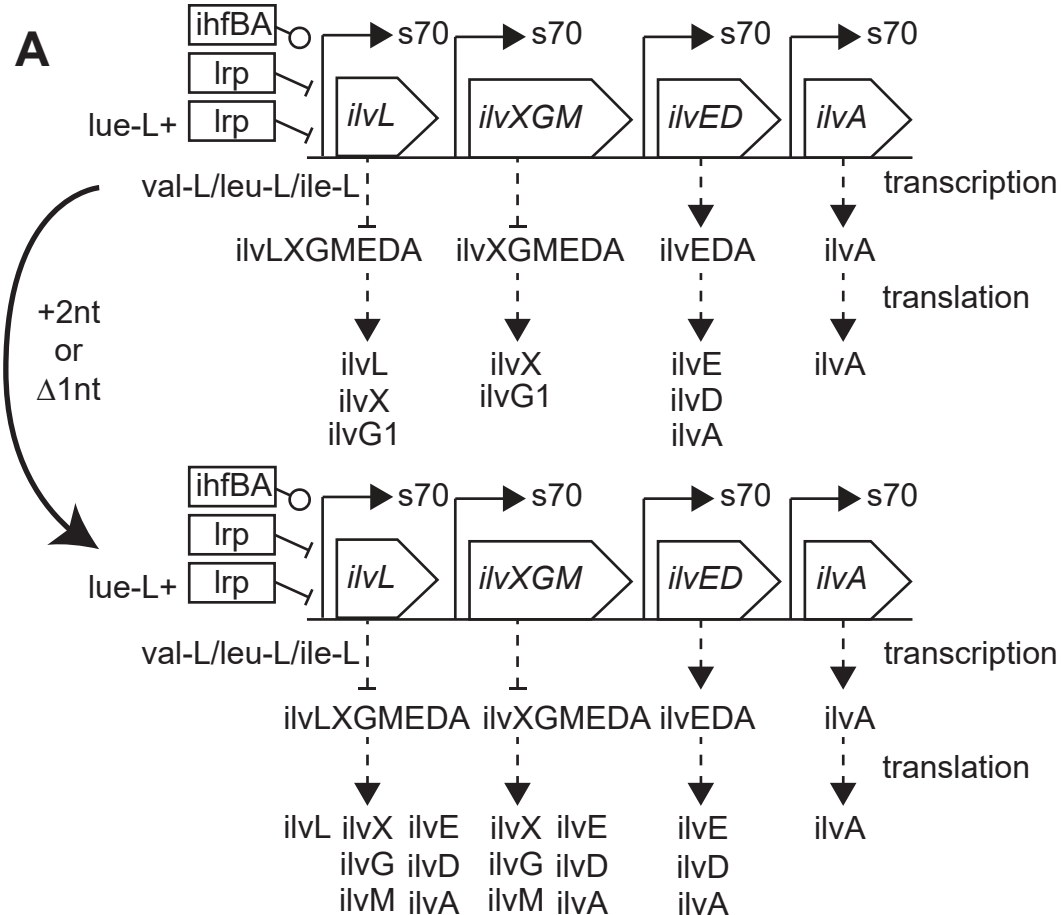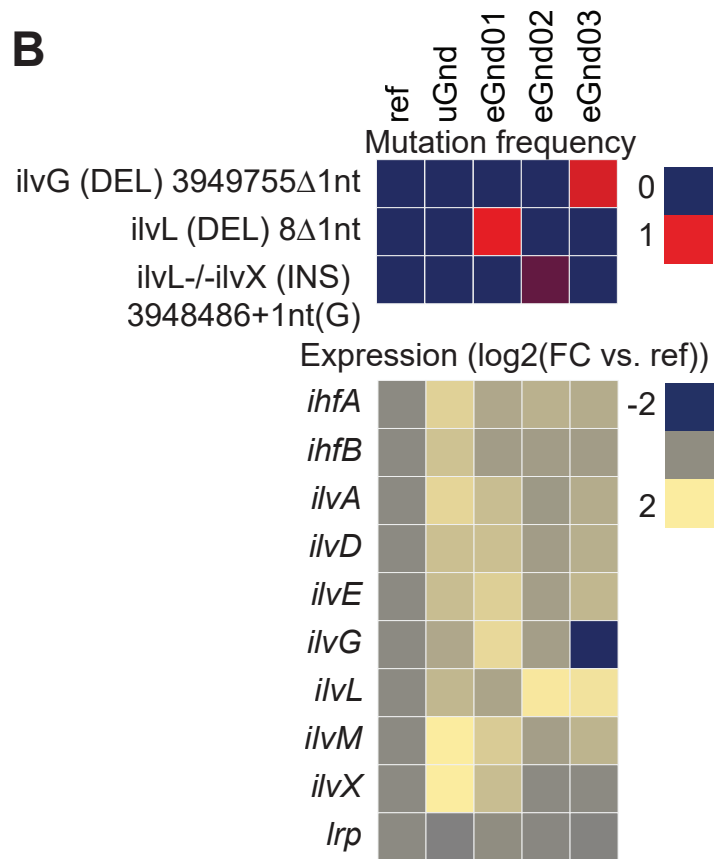

Supplement: Supplementary file [file 12725078]
